# Supplementary material for: Carbon for nutrient exchange between Lycopodiella inundata and Mucoromycotina fine root endophytes is unresponsive to high atmospheric CO2
Source: Springer Nature journal article supplement (doi:10.1007/s00572-021-01033-6), 2021-04-21
Supplement: MOESM1 [file 572_2021_1033_MOESM1_ESM.pdf]

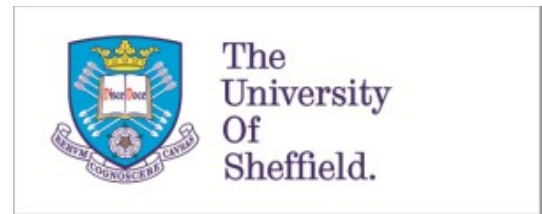

This is a repository copy of *Carbon for nutrient exchange between Lycopodiella inundata and Mucoromycotina fine root endophytes is unresponsive to high atmospheric CO<sub>2</sub>.*

White Rose Research Online URL for this paper:  
<https://eprints.whiterose.ac.uk/173806/>

Version: Supplemental Material

---

**Article:**

Hoysted, G.A., Kowal, J., Pressel, S. et al. (3 more authors) (2021) Carbon for nutrient exchange between *Lycopodiella inundata* and *Mucoromycotina* fine root endophytes is unresponsive to high atmospheric CO<sub>2</sub>. *Mycorrhiza*, 31 (4). pp. 431-440. ISSN 0940-6360

<https://doi.org/10.1007/s00572-021-01033-6>

---

**Reuse**

This article is distributed under the terms of the Creative Commons Attribution (CC BY) licence. This licence allows you to distribute, remix, tweak, and build upon the work, even commercially, as long as you credit the authors for the original work. More information and the full terms of the licence here:  
<https://creativecommons.org/licenses/>

**Takedown**

If you consider content in White Rose Research Online to be in breach of UK law, please notify us by emailing [eprints@whiterose.ac.uk](mailto:eprints@whiterose.ac.uk) including the URL of the record and the reason for the withdrawal request.

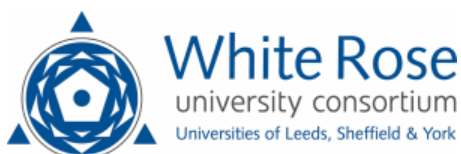

[eprints@whiterose.ac.uk](mailto:eprints@whiterose.ac.uk)  
<https://eprints.whiterose.ac.uk/>

## **Supplementary information**

### **Mycorrhiza – Original Paper**

#### **Carbon for nutrient exchange between *Lycopodiella inundata* and *Mucoromycotina* fine root endophytes is unresponsive to high atmospheric CO<sub>2</sub>.**

Grace A. Hoysted<sup>1\*</sup>, Jill Kowal<sup>2</sup>, Silvia Pressel<sup>3</sup>, Jeffrey G. Duckett<sup>3</sup>, Martin I. Bidartondo<sup>2,4</sup>,  
Katie J. Field<sup>1</sup>

#### **This file contains the following information:**

**Figure S1:** Schematic diagram and photograph of radio and stable isotope tracing system for a lycophyte host plant.

**Figure S2:** Comparison of colonisation of root segments colonised by CO<sub>2</sub> treatment.

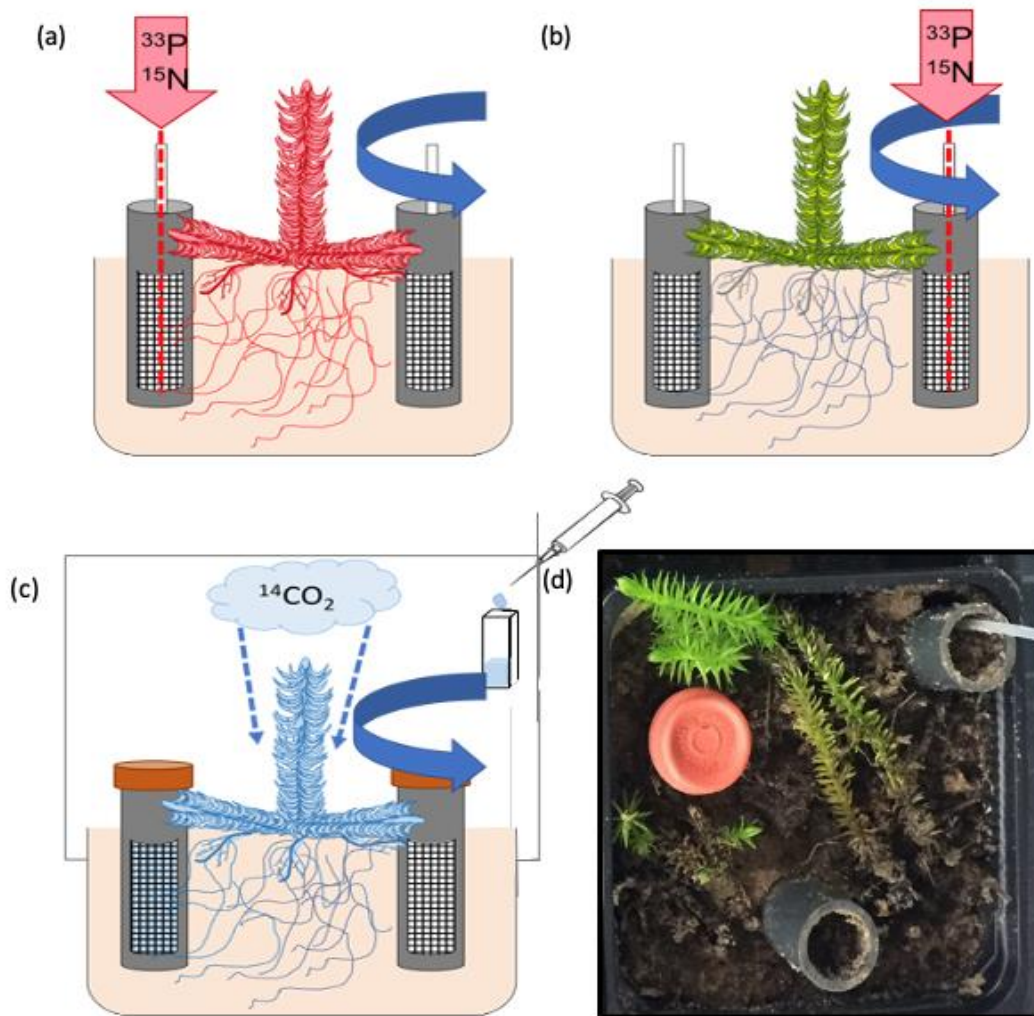

**Figure S1.** Schematic diagram and photograph of radio and stable isotope tracing experiment for a lycophyte host plant. (a) Microcosm containing static core in which  $^{33}\text{P}$  and  $^{15}\text{N}$  was injected; (b) Microcosm containing rotated core in which  $^{33}\text{P}$  and  $^{15}\text{N}$  was injected; (c) Microcosm set-up enclosed in an air-tight container in which  $^{14}\text{C}$  isotope tracing was conducted and (d) Photograph of *Lycopodiella inundata*-MFRE radio- and stable isotope tracing experimental system.

a)

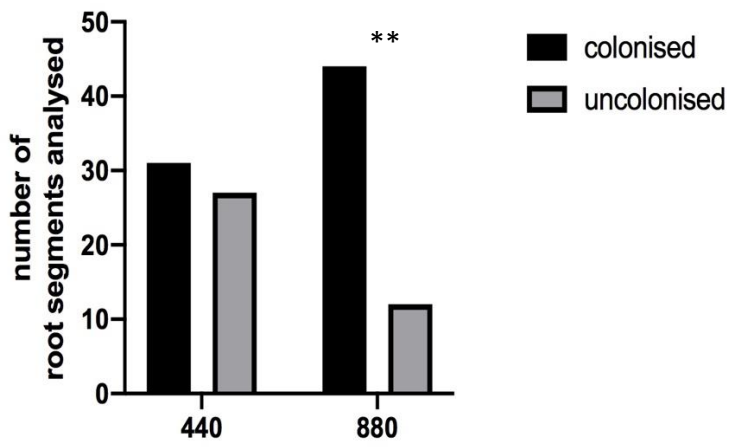

b)

### Mean total population analysed

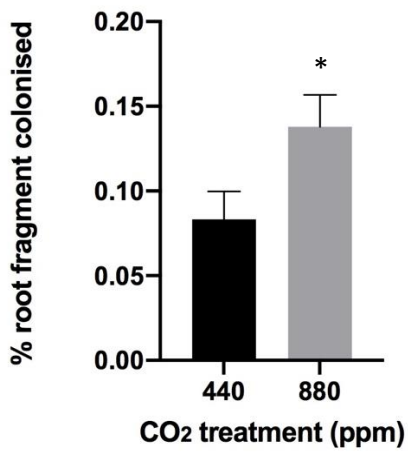

c)

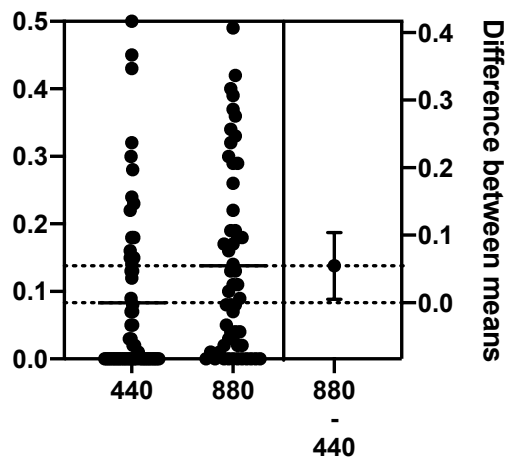

**Figure S2.** Comparison of colonisation of root segments colonised by CO<sub>2</sub> treatment. a) Proportion of total root segments analysed (Fisher's exact test, P value <0.01); b) Mean percentage colonised per root fragment (440 = 8.328%; 880 = 13.8%); c) Difference between the population means ( $0.05469 \pm 0.02507$ ; P value < 0.05).
